1 ***GSTM1* copy number is not associated with risk of kidney failure in**  
2 **a large cohort**

3 Yanfei Zhang<sup>1</sup>, PhD, Waleed Zafar<sup>2</sup>, MD, Dustin N. Hartzel<sup>3</sup>, BS, Marc S. Williams<sup>1</sup>, MD, Adrienne Tin<sup>4</sup>,  
4 PhD, Alexander R. Chang<sup>2\*</sup>, MD, Regeneron Genetics Center<sup>5</sup>, Ming Ta M. Lee<sup>1\*</sup>, PhD on behalf of the  
5 DiscovEHR collaboration

- 6 1. Genomic Medicine Institute, Geisinger, Danville, PA, USA
- 7 2. Kidney Institute, Geisinger, Danville, PA, USA
- 8 3. Phenomic Analytics & Clinical Data Core, Geisinger, Danville, PA, USA
- 9 4. Department of Epidemiology, Johns Hopkins University Bloomberg School of Public Health,  
10 MD, USA
- 11 5. Regeneron Genetics Center, Regeneron Pharmaceuticals, Inc., Tarrytown, NY, USA

12 Drs. Zhang and Zafar contributed equally to this article, so do Drs. Chang and Lee.

13 \* Corresponding: mlee2@geisinger.edu

14 **Corresponding author:** Ming Ta M. Lee, mlee2@geisinger.edu, Weis Center for Research, Geisinger,  
15 100 North Academy Ave, Danville, PA 17822, USA. Fax: 570-214-7342. Tel: 570-271-6664.

16 The sources of support that require acknowledgment: The Regeneron Genetics Center funded the  
17 collection of study samples, the generation of whole exome sequencing data.

18 **Running headline:** *GSTM1* and risk of kidney failure

19

20 **Abstract**

21 Deletion of *glutathione S-transferase μ1 (GSTM1)* is common in populations and has been asserted to  
22 associate with chronic kidney disease progression in some research studies. The association needs to be  
23 validated. We estimated *GSTM1* copy number using whole exome sequencing data in the DiscovEHR  
24 cohort. Kidney failure was defined as requiring dialysis or receiving kidney transplant using data from the  
25 electronic health record and linkage to the United States Renal Data System, or the most recent eGFR <  
26 15 ml/min/1.73m<sup>2</sup>. In a cohort of 46,983 unrelated participants, 28.8% of blacks and 52.1% of whites had  
27 0 copies of *GSTM1*. Over a mean of 9.2 years follow-up, 645 kidney failure events were observed in  
28 46,187 white participants, and 28 in 796 black participants. No significant association was observed  
29 between *GSTM1* copy number and kidney failure in Cox regression adjusting for age, sex, BMI, smoking  
30 status, genetic principal components, or co-morbid conditions (hypertension, diabetes, heart failure,  
31 coronary artery disease, and stroke), whether using a genotypic, dominant, or recessive model. In  
32 sensitivity analyses, *GSTM1* copy number was not associated with kidney failure in participants that were  
33 45 years or older at baseline, had baseline eGFR < 60 ml/min per 1.73 m<sup>2</sup>, or with baseline year between  
34 1996-2002. In conclusion, we found no association between *GSTM1* copy number and kidney failure in a  
35 large cohort study.

36 **Keywords:** *GSTM1*, kidney failure, copy number, large cohort

37

38 **Translational Statement**

39 Deletion of *GSTM1* has been shown to be associated with higher risk of kidney failure. However,  
40 inconsistent results have been reported. We used electronic health record and whole exome sequencing  
41 data of a large cohort from a single healthcare system to evaluate the association between *GSTM1* copy  
42 number and risk of kidney failure. We found no significant association between *GSTM1* copy number and  
43 risk of kidney failure overall, or in multiple sensitivity and subgroup analyses.

44

45

## 46 **Introduction**

47 *Glutathione S-transferase  $\mu$  1 (GSTM1)*, belongs to the family of glutathione-S-transferases that  
48 metabolize a broad range of reactive oxygen species and aldehydes.<sup>1,2</sup> Loss of *GSTM1* is very common in  
49 the population; approximately 50% of whites and 27% of blacks have zero copies of *GSTM1*.<sup>3</sup> Deletion of  
50 one or both copies of the gene results in reduced amount of GSTM1,<sup>4</sup> and could lead to increased  
51 oxidative stress due to diminished ability to neutralize reactive chemical species. An association between  
52 loss of *GSTM1* and chronic kidney disease (CKD) progression has been reported in the African American  
53 Study of Kidney and Hypertension (AASK).<sup>5</sup> The association between *GSTM1* copy number and kidney  
54 failure was reported in the Atherosclerosis Risk in Communities (ARIC) study which had a larger sample  
55 size, both in blacks and whites.<sup>6</sup> However, data from smaller case-control studies have had mixed  
56 findings.<sup>7-11</sup> The inconsistent results may be due to insufficient sample size and different populations and  
57 disease background.

58 The Geisinger MyCode® Community Health Initiative is an EHR-linked biobank for precision medicine  
59 research.<sup>12</sup> The population served by Geisinger have low rates of out migration, thus the electronic health  
60 record (EHR) data are relatively complete longitudinally, with a median of 14 years of follow-up.<sup>12</sup> Also,  
61 a high proportion of participants were found to have first and second-degree relatedness through cryptic  
62 relatedness analysis.<sup>13</sup> Through the ongoing DiscovEHR collaboration with the Regeneron Genetic  
63 Center, whole exome sequence (WES) data are available from approximately 92,000 MyCode®  
64 participants to date.<sup>12,14,15</sup> These comprehensive clinical data are linked to matched genetic data and  
65 provide power to identify disease-genetic associations.<sup>16</sup>

66 Confirming whether or not loss of *GSTM1* increases the risk of kidney failure is important, given the high  
67 prevalence of *GSTM1* loss in the population and the serious morbidity and mortality associated with  
68 kidney failure. In this study, we examine the relationship between *GSTM1* copy number and incident  
69 kidney failure in the Geisinger MyCode cohort.

## 70 **Results**

### 71 **Study cohort and baseline characteristics**

72 There were 46,983 unrelated participants included in the main analysis. Among these, 46,187 (98.3%)  
73 were white, and 796 (1.7%) were black. Frequency of *GSTM1* copy number differed between blacks and  
74 whites (Supplemental Figure 4). Almost half of the blacks (49.2%) had 1 copy of *GSTM1* compared with  
75 only 39.6% of whites, and more than half (52.1%) of whites had 0 copies of *GSTM1* compared with  
76 28.8% of blacks. Chi-square test indicated *GSTM1* copy number follows the HWE (Table 1. P-values  
77 were  $1 \times 10^{-4}$  for whites and 0.618 for blacks).

78 Baseline demographic and clinical characteristics of the participants stratified by race and *GSTM1* copy  
79 numbers are provided in table 1. The average baseline age for whites and blacks was 51 and 44 years old  
80 respectively. The mean baseline eGFR were 91 and 92 ml/min per  $1.73 \text{ m}^2$ . Prevalence of hypertension  
81 was 29% in whites and 44% in blacks, and prevalence of type 2 diabetes was 13% in whites and 21% in  
82 blacks at baseline. No statistically significant differences were observed for baseline characteristics  
83 among the three genotype groups when adjusted for multiple comparisons.

### 84 **Time-to-event analysis**

85 Over a mean follow-up of 9.2 years, there were a total of 645 kidney failure events in 46,187 white  
86 participants. Over a mean follow-up of 5.5 years, there were 28 events in 796 blacks. No significant  
87 difference in kidney failure-free survival was found across *GSTM1* copy numbers by log rank test (P=0.9  
88 and 0.5 for whites and blacks, respectively, Figure 1).

89 Findings were similar in Cox regression analyses adjusting for other covariates (Table 2). In the genotypic  
90 model, after adjusting for age, sex and the first 4 PCs, there was no difference in risk of kidney failure  
91 among white participants with 0 copies (hazard ratio [HR] 1.01, 95% confidence interval [CI]: 0.81-1.48)  
92 or 1 copy (HR 1.08, 95% CI: 0.80-1.47), compared to those with 2 copies. Findings were similar for black  
93 participants in the genotypic model adjusting for age, sex, and the first 4 PCs (0 copies HR 0.68, 95% CI:  
94 0.22-2.15; 1 copy HR 1.13, 95% CI: 0.44-2.90). In the dominant model, after adjusting for age, sex, and  
95 the first 4 PCs, there was again no difference in risk of kidney failure among participants with 0 or 1

96 copies for white participants (HR 1.10, 95% CI: 0.82-1.46) or black participants with 0 or 1 copies (HR  
97 0.96, 95% CI: 0.39-2.34), compared to their counterparts with 2 copies. In the recessive model, after  
98 adjusting for age, sex, and the first 4 PCs, there was no difference in risk of kidney failure among white  
99 participants with 0 copies (1.03, 95% CI: 0.88-1.20), or black participants with 0 copies (HR 0.63, 95%  
100 CI: 0.25-1.56), compared to their counterparts with 1 or 2 copies. Adjustment for additional renal risk  
101 factors in Model 2 yielded similar results (Table 2 and Supplemental Tables 1-3).

## 102 **Sensitivity analyses**

103 Analyses were performed on white participants who were older than 45 years of age at baseline  
104 (n=31406), had baseline eGFR < 60 ml/min/1.73m<sup>2</sup> (n=3129), or had index date before 2003 (n=14572).  
105 No statistically significant differences in the risk of kidney failure were identified for participants older  
106 than 45 years of age at baseline (0 copies: HR 1.03, 95% CI: 0.74-1.42; 1 copy: HR 0.99, 95% CI: 0.71-  
107 1.37), or those with baseline eGFR < 60 ml/min/1.73m<sup>2</sup> (0 copies: HR 1.13, 95% CI: 0.75-1.69; 1 copy  
108 HR 1.04, 95% CI: 0.69-1.57), or for those with baseline year before 2003 (0 copies: HR 0.88, 95% CI:  
109 0.59-1.32; 1 copy HR 0.88, 95% CI: 0.59-1.33) (Table 2 and Supplemental Tables 1-3).

## 110 **Discussion**

111 To our knowledge, this is the largest study to investigate the association of *GSTM1* copy number variation  
112 with kidney failure. There were a total of 46,187 unrelated whites and 796 blacks in the study with an  
113 average of 9.3 years' follow-up. The frequency of the *GSTM1* copy numbers were very similar to those  
114 reported previously.<sup>3,5,6</sup> Our results showed no significant association between *GSTM1* copy number and  
115 risk of kidney failure in unadjusted or adjusted analyses whether using a genotypic, dominant, or  
116 recessive genetic model.

117 Data from the ARIC and AASK cohorts suggested that the loss of *GSTM1* increased the risk of kidney  
118 failure or accelerated CKD progression.<sup>5,6,17</sup> In ARIC, a community-based cohort of middle-aged black  
119 and white participants, there were 3461 white participants with WES reads. In fully adjusted models  
120 among whites in ARIC, loss of *GSTM1* was associated with risk of kidney failure (0 or 1 copy vs. 2  
121 copies: HR 2.54; 95% CI: 1.32-4.88). It is possible that differences in baseline characteristics of the study

122 populations could explain differing findings. Our cohort had a lower prevalence of smoking (never  
123 smoking 48% vs. 38%), a higher prevalence of diabetes (14% vs. 8%), and was more contemporary  
124 (median baseline year 2004 vs. ARIC baseline year 1987-1989). However, in sensitivity analyses in  
125 14572 white participants with baseline year between 1996-2002 in our cohort, there was no association  
126 between *GSTM1* loss and risk of kidney failure.

127 There is also the possibility that *GSTM1* may only be deleterious when GFR falls below certain levels, or  
128 in the setting of specific types of kidney disease. In the AASK study, a randomized trial comparing  
129 different antihypertensive medications and levels of blood pressure control in blacks with CKD attributed  
130 to hypertension, 692 participants had *GSTM1* genotyping completed. Loss of *GSTM1* in AASK was  
131 associated with increased risk of CKD progression (HR 0 copy: HR 1.88; 95% CI: 1.07-3.30; HR 1 copy:  
132 1.68; 95% CI: 1.00-2.84). While there were few blacks in our study population with CKD, we found no  
133 association between loss of *GSTM1* and risk of kidney failure in 3129 white participants with baseline  
134 eGFR < 60 ml/min/1.73m<sup>2</sup>. Some smaller case-control studies also tested a recessive genetic model (0  
135 copies vs. 1 or 2 copies) of *GSTM1* and found that *GSTM1* 0 copy was associated with kidney failure in  
136 several case-control studies.<sup>5,10,11,18</sup> In our study, however, we examined both recessive and dominant  
137 genetic models, and found no associations between *GSTM1* copy number and risk of kidney failure.

138 Some limitations of this study are worth noting. First, the genotypes of *GSTM1* in this study were derived  
139 from WES and the thresholds were determined empirically from the histogram. Multiplex PCR validation  
140 was not performed for this study. However, this method was used in the ARIC study, which showed  
141 99.3% agreement when comparing the results of 0 copy with  $\geq 1$  copy from PCR.<sup>6</sup> Moreover, the  
142 frequency of *GSTM1* copy numbers in this study is similar to those reported previously for both whites  
143 and blacks,<sup>5,6</sup> and it follows the Hardy-Weinberg equilibrium. We also examined the possibility of miss-  
144 mapping due to the complexity of *GSTM* locus. The histogram of the sum of normalized coverage of  
145 *GSTM5*, the paralog gene of *GSTM1*, is unimodal distribution. Based on these evidences, we believe the  
146 copy number results derived from WES had a low error rate and can be used with confidence for analysis.

147 Second, the sample size for blacks was small with only 796 patients available for analysis, limiting the

148 power to examine an association between *GSTM1* and kidney failure in this population. The strength of  
149 this study is the large sample size of whites, which included 46,187 patients, allowing for large subgroup  
150 analyses in older patients, those with baseline eGFR < 60 ml/min/1.73m<sup>2</sup>, and those with longer duration  
151 of follow-up. Finally, *GSTM1* deletion is known to be protective for lung cancer among individuals with a  
152 high intake of cruciferous vegetable and deleterious among those with low intake of cruciferous  
153 vegetable.<sup>19-23</sup> We were not able to analyze the effect modification between *GSTM1* copy number and  
154 cruciferous vegetable intake.

155 In conclusion, our study does not support an association between loss of *GSTM1* and increased risk of  
156 kidney failure. Additional research is needed to confirm whether loss of *GSTM1* increases risk of kidney  
157 failure in certain subgroups such as blacks, and the interaction with diet.

158

## 159 **Methods**

### 160 **Study Population**

161 The study population included 72,756 participants in the Geisinger-Regeneron DiscovEHR cohort with  
162 WES data and at least 3 serum creatinine values. We excluded participants who had baseline eGFR < 15  
163 ml/min/1.73m<sup>2</sup> or history of dialysis or transplant (n=417), baseline age <18 (n=1,960), missing BMI  
164 values (n=230), and unknown smoking status (n=2,694). Cryptic relatedness was evaluated using IBD  
165 method in PLINK1.9.<sup>24</sup> One of the related pair of participants with PI\_HAT >= 0.125 were removed to  
166 reduce confounding from other shared genetic/environmental factors that could not be assessed, resulting  
167 in 46983 participants (Supplement Figure 1). We estimated eGFR using the CKD-Epidemiology  
168 Collaboration equation.<sup>25,26</sup> We defined the study period, from a baseline time of the second serum  
169 creatinine to the time of a renal endpoint, or the last serum creatinine test. All participants provided their  
170 informed written consent, and the study was approved by the Geisinger Institutional Review Board.

171 **Outcome definition**

172 An assignment of kidney failure was made if any of the following criteria was met: 1) the last available  
173 eGFR was less than 15 mL/min/1.73 m<sup>2</sup>; 2) the EHR showed an International Classification of Disease  
174 (ICD) code for end stage renal disease (ESRD) (ICD9: 585.6, ICD10: N18.6); 3) receipt of dialysis or  
175 transplant per linkage to the United States Renal Data System (USRDS). For participants who met more  
176 than one criteria, the earliest documented date of the criterion was considered the kidney failure date.

177 **Clinical variables**

178 The following data elements were extracted from the EHR: baseline age, sex, self-reported race, body  
179 mass index (BMI, BMI = Weight(kg)/Height(m)<sup>2</sup>), serum creatinine, smoking status; and ICD-9/10 coded  
180 diagnosis of hypertension, diabetes, coronary artery disease, heart failure, and stroke. Genetic principal  
181 components were calculated by PLINK1.9 ([www.cog-genomics.org/plink/1.9/](http://www.cog-genomics.org/plink/1.9/)).<sup>24</sup>

182 ***GSTM1* and *GSTM5* copy number estimation**

183 DNA was sequenced in two batches at the Regeneron Genetic Center. The WES data processing has been  
184 described elsewhere,<sup>13,15</sup> and details are also provided in the supplementary methods. Copy number of  
185 *GSTM1* was estimated using the method reported previously.<sup>6</sup> Briefly, sequence coverage was normalized  
186 using CLAMMS software.<sup>27</sup> Normalized coverage of all eight exons of *GSTM1* was summed for each  
187 participant. Thresholds for *GSTM1* copy number were determined empirically according to the  
188 distribution of sum of normalized coverage (Supplementary Figure 2). The copy number of *GSTM5* was  
189 estimated the same way as *GSTM1* (Supplementary notes).

190 **Statistical analyses**

191 Hardy-Weinberg equilibrium (HWE) was estimated using Chi-Square test for *GSTM1* copy number. A  
192 more stringent significance level of 1e<sup>-5</sup> was selected due to the large sample size (46,187) for Whites.  
193 Nominal significance level of 0.05 was used for Blacks as the small sample size (796). Missing baseline  
194 BMI values were imputed using mean BMI values calculated from all available BMI values for each  
195 participant, and missing smoking status at baseline was imputed using the most recent recorded smoking  
196 status in the EHR (Supplemental Figure 3). Baseline characteristics were compared using ANOVA for



197 continuous variables, and chi-squared tests for categorical variables. A p-value of  $< 0.05/N$  was  
198 considered statistically significant after Bonferroni adjustment for multiple comparisons, where  $N$  is the  
199 number of variables compared. Kaplan–Meier curves were plotted by *GSTM1* copy number, and survival  
200 differences between genotype groups were assessed using a log rank test. All subsequent analyses were  
201 stratified by race given the difference in allele frequency and sample size. Two models were evaluated. In  
202 Model 1, Cox proportional hazards model was adjusted for age, sex and the first four genetic principle  
203 components; Based on Model 1, Model 2 was additionally adjusted for risk factors including baseline  
204 eGFR, smoking status, BMI, hypertension, diabetes, coronary artery disease, heart failure and stroke.  
205 Three genetic models were evaluated: 1) genotypic model, using copy number 0,1, and 2 as three  
206 categories; 2) dominant model (0 or 1 copy vs. 2 copies *GSTM1*); 3) recessive model (1 or 2 copies vs. 0  
207 copies of *GSTM1*). To explore whether the effect of *GSTM1* loss was stronger in specific higher-risk  
208 subgroups, sensitivity analyses were completed including subsets of 1) older participants (baseline age  $\geq$   
209 45 years); 2) participants with CKD (baseline eGFR  $< 60$  ml/min per  $1.73$  m<sup>2</sup>); 3) participants with longer  
210 follow-up (baseline year 1996-2002). Power was estimated using powerCT() function in R package  
211 powerSurvEpi 0.1.0. Given the current sample size and event number, we have power of  $\geq 0.8$  to test  
212 hazard ratio of at least 1.4 and 2.8 for white and black cohort, respectively. All analyses were performed  
213 using R (version 3.4.3).

## 214 **Disclosure**

215 Regeneron Genetics Center authors work for Regeneron Pharmaceuticals.

## 216 **Acknowledgments**

217 The authors thank the staff and participants of MyCode. The Regeneron Genetics Center funded the  
218 collection of study samples, the generation of whole exome sequencing data. Geisinger provided funding  
219 for clinical data extraction and other analysis. A.C. is supported by National Institutes of Health/National  
220 Institute of Diabetes and Digestive and Kidney Diseases grant K23 DK106515-01. Data reported here  
221 were supplied by the U.S. Renal Data System. The interpretation and reporting of these data are the

222 responsibility of the authors and in no way should be seen as an official policy or interpretation of the  
223 U.S. government. The authors thank Ilene G. Ladd who is the project manager at Genomic Medicine  
224 Institute for English editing.

225

## 226 **References**

- 227 1. Yang Y, Parsons KK, Chi L, Malakauskas SM, Le TH. Glutathione S-transferase-micro1 regulates  
228 vascular smooth muscle cell proliferation, migration, and oxidative stress. *Hypertension*.  
229 2009;54(6):1360-1368.
- 230 2. Hayes JD, Flanagan JU, Jowsey IR. Glutathione transferases. *Annu Rev Pharmacol Toxicol*.  
231 2005;45:51-88.
- 232 3. Garte S, Gaspari L, Alexandrie AK, et al. Metabolic gene polymorphism frequencies in control  
233 populations. *Cancer Epidemiol Biomarkers Prev*. 2001;10(12):1239-1248.
- 234 4. Board P, Coggan M, Johnston P, Ross V, Suzuki T, Webb G. Genetic heterogeneity of the human  
235 glutathione transferases: a complex of gene families. *Pharmacol Ther*. 1990;48(3):357-369.
- 236 5. Chang J, Ma JZ, Zeng Q, et al. Loss of GSTM1, a NRF2 target, is associated with accelerated  
237 progression of hypertensive kidney disease in the African American Study of Kidney Disease  
238 (AASK). *Am J Physiol Renal Physiol*. 2013;304(4):F348-355.
- 239 6. Tin A, Scharpf R, Estrella MM, et al. The Loss of GSTM1 Associates with Kidney Failure and Heart  
240 Failure. *J Am Soc Nephrol*. 2017;28(11):3345-3352.
- 241 7. Yang Y, Kao MT, Chang CC, et al. Glutathione S-transferase T1 deletion is a risk factor for  
242 developing end-stage renal disease in diabetic patients. *Int J Mol Med*. 2004;14(5):855-859.
- 243 8. Tiwari AK, Prasad P, B KT, et al. Oxidative stress pathway genes and chronic renal insufficiency in  
244 Asian Indians with Type 2 diabetes. *J Diabetes Complications*. 2009;23(2):102-111.
- 245 9. Nomani H, Hagh-Nazari L, Aidy A, et al. Association between GSTM1, GSTT1, and GSTP1 variants  
246 and the risk of end stage renal disease. *Ren Fail*. 2016;38(9):1455-1461.
- 247 10. Gutierrez-Amavizca BE, Orozco-Castellanos R, Ortiz-Orozco R, et al. Contribution of GSTM1,  
248 GSTT1, and MTHFR polymorphisms to end-stage renal disease of unknown etiology in Mexicans.  
249 *Indian J Nephrol*. 2013;23(6):438-443.
- 250 11. Agrawal S, Tripathi G, Khan F, Sharma R, Baburaj VP. Relationship between GSTs gene  
251 polymorphism and susceptibility to end stage renal disease among North Indians. *Ren Fail*.  
252 2007;29(8):947-953.
- 253 12. Carey DJ, Fetterolf SN, Davis FD, et al. The Geisinger MyCode community health initiative: an  
254 electronic health record-linked biobank for precision medicine research. *Genet Med*.  
255 2016;18(9):906-913.
- 256 13. Staples J, Maxwell EK, Gosalia N, et al. Profiling and Leveraging Relatedness in a Precision  
257 Medicine Cohort of 92,455 Exomes. *Am J Hum Genet*. 2018;102(5):874-889.
- 258 14. Abul-Husn NS, Manickam K, Jones LK, et al. Genetic identification of familial  
259 hypercholesterolemia within a single U.S. health care system. *Science*. 2016;354(6319).
- 260 15. Dewey FE, Murray MF, Overton JD, et al. Distribution and clinical impact of functional variants in  
261 50,726 whole-exome sequences from the DiscovEHR study. *Science*. 2016;354(6319).
- 262 16. Rader DJ, Damrauer SM. "Pheno"menal value for human health. *Science*. 2016;354(6319):1534-  
263 1536.

- 264 17. Bodonyi-Kovacs G, Ma JZ, Chang J, et al. Combined Effects of GSTM1 Null Allele and APOL1 Renal  
265 Risk Alleles in CKD Progression in the African American Study of Kidney Disease and  
266 Hypertension Trial. *J Am Soc Nephrol*. 2016;27(10):3140-3152.
- 267 18. Suvakov S, Damjanovic T, Stefanovic A, et al. Glutathione S-transferase A1, M1, P1 and T1 null or  
268 low-activity genotypes are associated with enhanced oxidative damage among haemodialysis  
269 patients. *Nephrol Dial Transplant*. 2013;28(1):202-212.
- 270 19. London SJ, Yuan JM, Chung FL, et al. Isothiocyanates, glutathione S-transferase M1 and T1  
271 polymorphisms, and lung-cancer risk: a prospective study of men in Shanghai, China. *Lancet*.  
272 2000;356(9231):724-729.
- 273 20. Zhao B, Seow A, Lee EJ, et al. Dietary isothiocyanates, glutathione S-transferase -M1, -T1  
274 polymorphisms and lung cancer risk among Chinese women in Singapore. *Cancer Epidemiol  
275 Biomarkers Prev*. 2001;10(10):1063-1067.
- 276 21. Wang LI, Giovannucci EL, Hunter D, Neuberger D, Su L, Christiani DC. Dietary intake of Cruciferous  
277 vegetables, Glutathione S-transferase (GST) polymorphisms and lung cancer risk in a Caucasian  
278 population. *Cancer Causes Control*. 2004;15(10):977-985.
- 279 22. Brennan P, Hsu CC, Moullan N, et al. Effect of cruciferous vegetables on lung cancer in patients  
280 stratified by genetic status: a mendelian randomisation approach. *Lancet*. 2005;366(9496):1558-  
281 1560.
- 282 23. Carpenter CL, Yu MC, London SJ. Dietary isothiocyanates, glutathione S-transferase M1 (GSTM1),  
283 and lung cancer risk in African Americans and Caucasians from Los Angeles County, California.  
284 *Nutr Cancer*. 2009;61(4):492-499.
- 285 24. Chang CC, Chow CC, Tellier LC, Vattikuti S, Purcell SM, Lee JJ. Second-generation PLINK: rising to  
286 the challenge of larger and richer datasets. *Gigascience*. 2015;4:7.
- 287 25. Levey AS, Stevens LA, Schmid CH, et al. A new equation to estimate glomerular filtration rate.  
288 *Ann Intern Med*. 2009;150(9):604-612.
- 289 26. Levey AS, Stevens LA. Estimating GFR using the CKD Epidemiology Collaboration (CKD-EPI)  
290 creatinine equation: more accurate GFR estimates, lower CKD prevalence estimates, and better  
291 risk predictions. *Am J Kidney Dis*. 2010;55(4):622-627.
- 292 27. Packer JS, Maxwell EK, O'Dushlaine C, et al. CLAMMS: a scalable algorithm for calling common  
293 and rare copy number variants from exome sequencing data. *Bioinformatics*. 2016;32(1):133-  
294 135.

295

296

297

298

299 **Author Contributions**

300 A.T, A.C, and M.T.M.L designed the study; D.N.H extracted data; Y.Z and W.Z performed the analysis  
 301 and drafted the manuscript. M.S.W, M.T.M.L and A.C did critical review on the paper. RGC supported  
 302 the study and did review the manuscript. All authors approved the final version of the manuscript.

303 **Tables:**

304 **Table 1: Baseline characteristics of participants by *GSTM1* copy number**  
 305

| Characteristic | Whites      |              |             |             | Blacks |            |            |            |         |
|----------------|-------------|--------------|-------------|-------------|--------|------------|------------|------------|---------|
|                | Copy number | 0            | 1           | 2           | P      | 0          | 1          | 2          | P       |
| N.             |             | 24141        | 18255       | 3791        | 1E-4 ^ | 233        | 388        | 175        | 0.618 ^ |
| Age            |             | 50.9(14.1)   | 50.8(14.0)  | 51.2(14.3)  | 0.317  | 41.8(12.3) | 44.7(12.1) | 44.3(13.2) | 0.015   |
| Female, n(%)   |             | 14184(58.8)  | 10750(58.9) | 2208(58.2)  | 0.763  | 148(63.5)  | 240(61.9)  | 103(58.9)  | 0.629   |
| eGFR           |             | 91.8(20.3)   | 91.7(20.4)  | 91.3(20.8)  | 0.326  | 95.0(22.9) | 90.8(23.2) | 91.9(24.4) | 0.095   |
| BMI            |             | 31.6(7.9)    | 31.6(7.8)   | 31.6(7.9)   | 0.817  | 33.5(9.3)  | 34.7(9.6)  | 34.5(10.2) | 0.299   |
| Smoking Status |             |              |             |             |        |            |            |            |         |
| Current Smoker |             | 4688 (19.4)  | 3521 (19.3) | 769 (20.3)  | 0.418  | 65 (27.9)  | 109 (28.1) | 55 (31.4)  | 0.785   |
| Former Smoker  |             | 7803 (32.3)  | 5829 (31.9) | 1231 (32.5) |        | 64 (27.5)  | 117 (30.2) | 52 (29.7)  |         |
| Never Smoker   |             | 11650 (48.3) | 8905 (48.8) | 1791 (47.2) |        | 104 (44.6) | 162 (41.8) | 68 (38.9)  |         |
| Hypertension   |             | 7193 (29.8)  | 5409 (29.6) | 1118 (28.4) | 0.893  | 96 (41.2)  | 169 (43.6) | 83 (47.4)  | 0.453   |
| T1DM           |             | 251 (1.0)    | 205 (1.1)   | 50 (1.3)    | 0.277  | 6 (2.5)    | 12 (3.1)   | 5 (2.9)    | 0.932   |
| T2DM           |             | 3130 (13.0)  | 2299 (12.6) | 483 (12.7)  | 0.522  | 40 (17.2)  | 92 (23.7)  | 35 (20.0)  | 0.143   |
| CAD            |             | 1384 (5.7)   | 1072 (5.9)  | 241 (6.4)   | 0.304  | 0          | 0          | 0          | /       |
| HF             |             | 568 (2.4)    | 402 (2.2)   | 110 (2.9)   | 0.034  | 10 (4.3)   | 12 (3.1)   | 7 (4.0)    | 0.713   |
| Stroke         |             | 413(1.7)     | 304(1.7)    | 69(1.8)     | 0.789  | 4(1.7)     | 11(2.8)    | 8(4.6)     | 0.233   |

306 ^ Hardy-Weinberg equilibrium test using Chi-Square test. Consider the sample size for Whites (46,187), we selected a more stringent  
 307 significance level of 1E-5.

308 P<0.0045 (0.05/11) was considered statistically significant. T1DM: Type 1 diabetes mellitus. T2DM: type 2 diabetes mellitus. CAD: coronary  
 309 artery disease; HF: heart failure.

310

311 **Table 2: Risk of kidney failure associated with *GSTM1* copy number**

| Population                                    | Hazard Ratio [95% CI]           |       |                   |       |                   |       |                   |       |
|-----------------------------------------------|---------------------------------|-------|-------------------|-------|-------------------|-------|-------------------|-------|
|                                               | Genotypic Model (Ref: 2 copies) |       |                   |       | Dominant Model    |       | Recessive Model   |       |
|                                               | 0 copy                          | P     | 1 copy            | P     | 0/1 vs 2          | P     | 0 vs 1/2          | P     |
| Blacks (28/796)                               |                                 |       |                   |       |                   |       |                   |       |
| Model 1                                       | 0.68 [0.22, 2.15]               | 0.516 | 1.13 [0.44, 2.90] | 0.802 | 0.96 [0.39, 2.34] | 0.937 | 0.63 [0.25, 1.56] | 0.316 |
| Model 2                                       | 0.67 [0.19, 2.34]               | 0.527 | 0.63 [0.22, 1.84] | 0.399 | 0.64 [0.23, 1.77] | 0.391 | 0.93 [0.33, 2.59] | 0.883 |
| Whites (645/46187)                            |                                 |       |                   |       |                   |       |                   |       |
| Model 1                                       | 1.01 [0.81, 1.48]               | 0.537 | 1.08 [0.80, 1.47] | 0.604 | 1.10 [0.82, 1.46] | 0.551 | 1.03 [0.88, 1.20] | 0.732 |
| Model 2                                       | 1.14 [0.84, 1.54]               | 0.398 | 1.15 [0.84, 1.56] | 0.384 | 1.14 [0.85, 1.53] | 0.375 | 1.02 [0.87, 1.19] | 0.836 |
| Whites, Baseline Age>=45 (518/31406)          |                                 |       |                   |       |                   |       |                   |       |
| Model 1                                       | 1.03 [0.74, 1.42]               | 0.878 | 0.99 [0.71, 1.37] | 0.931 | 1.01 [0.74, 1.34] | 0.960 | 1.04 [0.87, 1.23] | 0.673 |
| Model 2                                       | 1.12 [0.81, 1.54]               | 0.504 | 1.07 [0.77, 1.49] | 0.677 | 1.10 [0.80, 1.50] | 0.562 | 1.05 [0.89, 1.25] | 0.553 |
| Whites, Baseline eGFR<60 (304/3129)           |                                 |       |                   |       |                   |       |                   |       |
| Model 1                                       | 1.13 [0.75, 1.69]               | 0.556 | 1.04 [0.69, 1.57] | 0.860 | 1.09 [0.74, 1.61] | 0.670 | 1.10 [0.87, 1.37] | 0.429 |
| Model 2                                       | 1.03 [0.68, 1.55]               | 0.891 | 1.03 [0.68, 1.56] | 0.897 | 1.03 [0.69, 1.53] | 0.889 | 1.01 [0.80, 1.27] | 0.956 |
| Whites, Baseline Year before 2003 (310/14572) |                                 |       |                   |       |                   |       |                   |       |
| Model 1                                       | 0.88 [0.59, 1.32]               | 0.542 | 0.88 [0.59, 1.33] | 0.553 | 0.88 [0.60, 1.30] | 0.529 | 0.98 [0.78, 1.22] | 0.841 |
| Model 2                                       | 0.86 [0.57, 1.29]               | 0.460 | 0.89 [0.59, 1.34] | 0.563 | 0.87 [0.59, 1.29] | 0.485 | 0.95 [0.76, 1.19] | 0.648 |

312 Model 1: adjusted for age, sex, first 4 genetic principle components. Model 2: Model 1 plus baseline eGFR, BMI, smoking status, hypertension,  
 313 type 1 diabetes, type 2 diabetes, heart failure, coronary artery disease, and stroke.

314

315 **Figures and figure legends:**  
 316

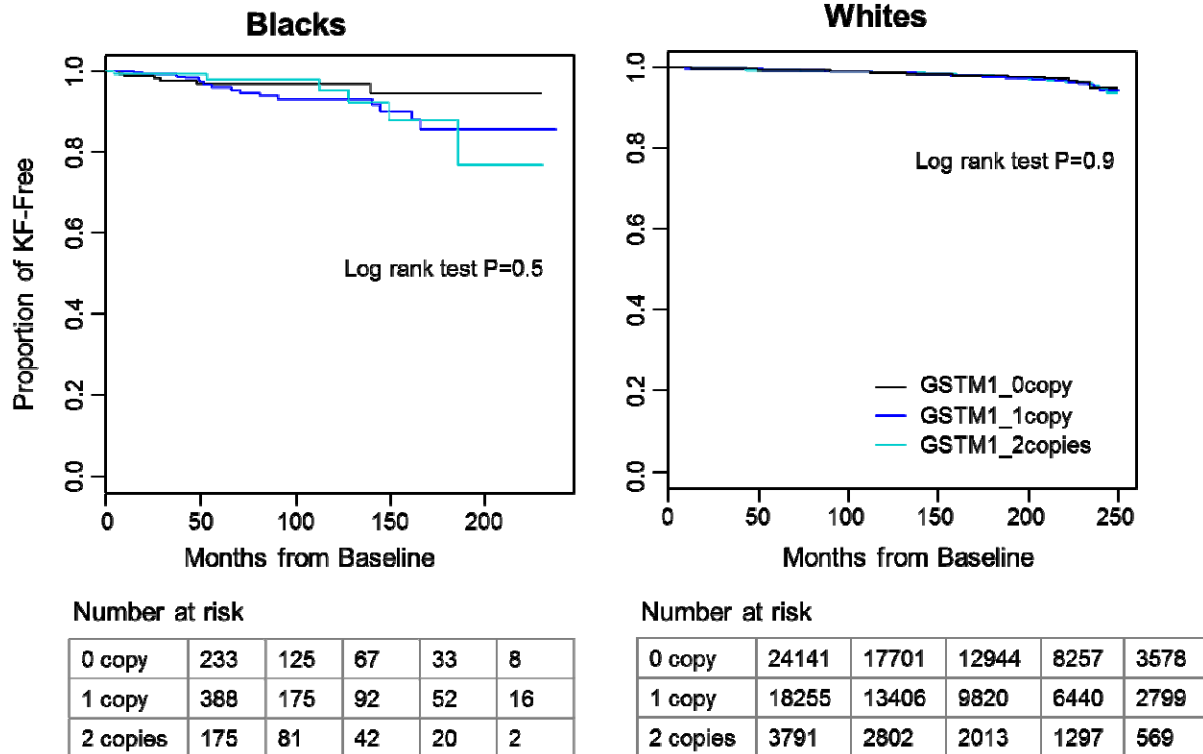

317

318 **Figure 1:** Kaplan-Meier survival curves of time to kidney failure by *GSTM1* copy number in white and  
 319 black participants. In both races, participants without *GSTM1* (black line) had longer kidney failure-free  
 320 survival time than those with 1 or 2 copies of *GSTM1* (blue and cyan lines). No significant difference  
 321 was found by log rank test. Tables below the figure showed the number of patients at risk with start time  
 322 at Month 0, 50, 100, 150 and 200.

323

324
